# Supplementary material
Source: MDPI journal article supplement (https://www.mdpi.com/2071-1050/12/3/1224)
Supplement: s1 [file s1]

## Video Storyboard Grading

|                         | 4                                                                                                                                              | 3                                                                                                                                          |
|-------------------------|------------------------------------------------------------------------------------------------------------------------------------------------|--------------------------------------------------------------------------------------------------------------------------------------------|
| Story of the Storyboard | From start to finish, a clear, sequential, story is told. We can tell who is the audience, and what they are supposed to learn from the video. | The storyboard only has two of the three narrative components: telling a story, aimed at an audience, and having a clear learning outcome. |
| Title                   | Storyboard contains title, student's names, and author.                                                                                        | Storyboard is missing 1 of the title requirements.                                                                                         |
| Required elements       | Storyboard includes all required elements: title, setting, characters, plot, conflict, solution, and conclusion                                | Storyboard is missing 1 required element.                                                                                                  |
| Content                 | Storyboard contains 3-5 appropriate sentences for all required elements                                                                        | Storyboard does not contain 3-5 appropriate sentences for 1 of the required elements.                                                      |
| Illustrations           | Storyboard contains one illustration for each required element                                                                                 | Storyboard is missing 1 required illustration                                                                                              |
| Grammar/Mechanics       | Storyboard contains no errors in grammar, capitalization, or punctuation                                                                       | Storyboard contains 1-2 errors in grammar, capitalization, or punctuation                                                                  |
| Attractiveness          | Storyboard is exceptionally attractive in terms of design, layout, and neatness                                                                | Storyboard is attractive in terms of design, layout, and neatness.                                                                         |
| Rating Scale            |                                                                                                                                                |                                                                                                                                            |
|                         | 20-24 points                                                                                                                                   | 90-100                                                                                                                                     |
|                         | 16-19 points                                                                                                                                   | 80-89                                                                                                                                      |
|                         | 12-15 points                                                                                                                                   | 70-79                                                                                                                                      |
|                         | 6-11 points                                                                                                                                    | 65-69                                                                                                                                      |

## Rubric

| 2                                                                                                                                                                                                             | 1                                                                                                                                                                                                                                |
|---------------------------------------------------------------------------------------------------------------------------------------------------------------------------------------------------------------|----------------------------------------------------------------------------------------------------------------------------------------------------------------------------------------------------------------------------------|
| The storyboard only has one of the three narrative components: telling a story, aimed at an audience, and having a clear learning outcome.<br>Storyboard is missing two of the title requirements             | The storyboard does not tell a story, the audience is not clear, and the desired learning outcome is not clear.<br>No title or wrong information in title square (#1)                                                            |
| Storyboard is missing 2 required elements                                                                                                                                                                     | Storyboard is missing 3 or more required elements.                                                                                                                                                                               |
| Storyboard does not contain 3-5 appropriate sentences for 2 of the required elements.                                                                                                                         | Storyboard does not contain 3-5 appropriate sentences for 3 or more of the required elements.                                                                                                                                    |
| Storyboard is missing 2 required illustrations<br>Storyboard contains 3-4 errors in grammar, capitalization, or punctuation<br>Storyboard is acceptably attractive in terms of thought it may be a bit messy. | Storyboard is missing 3 or more required illustrations<br>Storyboard contains 5 or more errors in grammar, capitalization, or punctuation<br>Storyboard is distractingly messy or very poorly designed.<br>It is not attractive. |

## Video Grade

|                                       | 5                                                                                                          | 4                                                                                                                 |
|---------------------------------------|------------------------------------------------------------------------------------------------------------|-------------------------------------------------------------------------------------------------------------------|
| Visual appeal                         | Visual appeal is excellent. Excellent use of graphics, color, white space, icons                           | Visual appeal is good. Good use of graphics, color, white space, icons                                            |
| Text Components                       | The text components in each shot are well-connected and carefully presented                                | The text components in each shot are connected and well-presented                                                 |
| Language, repertoire, clarity of text | Demonstrates accurate and consistent use of technical language                                             | Demonstrates appropriate use of technical language most of the time                                               |
| Sequencing/overall flow               | Video has good transitions, special effects, sound and title tracks. All parts show a logical progression. | Video has adequate transitions, special effects, sound, and title tracks. Video has adequate sequencing and flow. |
| Purpose/audience                      | The video has a clear purpose, and effectively aims a message towards the desired audience.                | The video's purpose is somewhat clear, and the desired audience is somewhat identifiable.                         |

## ding Rubric

| 3                                                                                                  | 2                                                                                                                                | 1                                                                                              |
|----------------------------------------------------------------------------------------------------|----------------------------------------------------------------------------------------------------------------------------------|------------------------------------------------------------------------------------------------|
| Visual appeal is adequate on balance                                                               | Some aspects of visual appeal are adequate, but others are poor                                                                  | Little or no attention to visual appeal in the video                                           |
| The text components in most of the shorts are connected and well-presented                         | The text components in few of the shots are adequately connected and presented                                                   | The text components are not connected and poorly presented                                     |
| Demonstrates appropriate, but intermittent, use of technical language                              | Often misses the opportunity to use technical language to convey message                                                         | Innappropriate use of technical language                                                       |
| The video has somewhat of a logical sequence and flow, but has some places where this is not true. | The video has many places with poor or missing transitions, text, sounds, etc                                                    | The video appears hastily thrown together and does not show logical sequence to tell a story.. |
| The video may contain a purpose and an audience, but they are not well-matched.                    | The video does not fulfill a purpose, but has an audience; or has a purpose but does not aim at the desired audience effectively | The video does not effectively address either purpose or audience.                             |

20

20

20

20

20
